# Supplementary material
Source: publisher figshare collection journal article supplement (https://frontiersin.figshare.com/ndownloader/files/20774469)
Supplement: Supplementary file 1 [file 20774469]

**Table S1.** Sequencing depth values for all taxa and metazoan taxa only, for the four eDNA datasets and across the 18 collected samples.

| **Sequencing depth (all taxa)** | | | |
| --- | --- | --- | --- |
| *Dataset* | *Mean number of reads per sample* | *Mean number of reads per OTU* | *Mean number of OTUs per sample* |
| 18S-V1V2 | 38,933.33 | 257.66 | 394.16 |
| 18S-V4 | 34,354.67 | 189.16 | 517.94 |
| 18S-V9 | 51,124.50 | 128.79 | 1,486.28 |
| COI | 61,001.39 | 181.37 | 822.22 |
|  | | | |
| **Sequencing depth (metazoan taxa)** | | | |
| *Dataset* | *Mean number of reads per sample* | *Mean number of reads per OTU* | *Mean number of OTUs per sample* |
| 18S-V1V2 | 22,785.44 | 990.67 | 112.66 |
| 18S-V4 | 13,310.17 | 788.10 | 77.55 |
| 18S-V9 | 31,001.72 | 1,917.63 | 96.16 |
| COI | 24,863.56 | 799.18 | 105.72 |
